# Supplementary material for: Structural evolution, electronic and magnetic manners of small rhodium Rhn+/−(n = 2–8) clusters: a detailed density functional theory study
Source: Royal Society of Chemistry journal article supplement (doi:10.1039/c5ra21600a), 2015-12-14
Supplement: c5ra21600a1.pdf [file c5ra21600a1.pdf]

Electronic Supplementary Information (ESI)

Manuscript ID RA-ART-10-2015-021600

Abhijit Dutta, Paritosh Mondal\*

Department of Chemistry, Assam University, Silchar 788011, Assam, India

\*Corresponding author: Email: paritos\_au@yahoo.co.in

Table S1. Average length (Å) values of neutral, cationic and anionic cluster evaluated at BLYP/DNP level.

| Cluster size    | Neutral | Cationic | Anionic |
|-----------------|---------|----------|---------|
| Rh <sub>2</sub> | 2.308   | 2.355    | 2.353   |
| Rh <sub>3</sub> | 2.448   | 2.448    | 2.494   |
| Rh <sub>4</sub> | 2.518   | 2.512    | 2.550   |
| Rh <sub>5</sub> | 2.532   | 2.538    | 2.543   |
| Rh <sub>6</sub> | 2.491   | 2.484    | 2.497   |
| Rh <sub>7</sub> | 2.539   | 2.521    | 2.527   |
| Rh <sub>8</sub> | 2.459   | 2.474    | 2.461   |

Table S2. LUMO-HOMO gap (eV) of Rh<sub>n</sub>(n=2-8) clusters calculated at BLYP/DNP level

| Cluster size    | Neutral cluster | Anionic cluster | Cationic cluster |
|-----------------|-----------------|-----------------|------------------|
| Rh <sub>2</sub> | 0.423           | 0.161           | 0.283            |
| Rh <sub>3</sub> | 0.604           | 0.400           | 0.432            |
| Rh <sub>4</sub> | 1.158           | 0.885           | 1.006            |
| Rh <sub>5</sub> | 0.246           | 0.262           | 0.369            |
| Rh <sub>6</sub> | 0.365           | 0.106           | 0.199            |
| Rh <sub>7</sub> | 0.033           | 0.165           | 0.213            |
| Rh <sub>8</sub> | 0.165           | 0.064           | 0.107            |

Table S3: Vertical ionization energy, electron affinity, chemical hardness, electro negativity and electrophilicity values in eV of Rh<sub>n</sub> (n=2-8) clusters

|                 | Vertical ionization energy | Vertical electron affinity | Hardness | Electro negativity | Electrophilicity |
|-----------------|----------------------------|----------------------------|----------|--------------------|------------------|
| Rh <sub>2</sub> | 7.503                      | 0.900                      | 3.301    | 4.201              | 2.674            |
| Rh <sub>3</sub> | 7.033                      | 0.779                      | 3.126    | 3.906              | 2.439            |
| Rh <sub>4</sub> | 6.480                      | 0.505                      | 2.987    | 3.492              | 2.041            |
| Rh <sub>5</sub> | 5.905                      | 0.977                      | 2.463    | 3.441              | 2.403            |

|                 |       |       |       |       |       |
|-----------------|-------|-------|-------|-------|-------|
| Rh <sub>6</sub> | 5.455 | 1.484 | 1.985 | 3.470 | 3.032 |
| Rh <sub>7</sub> | 5.761 | 1.500 | 2.130 | 3.631 | 3.094 |
| Rh <sub>8</sub> | 5.687 | 1.709 | 1.989 | 3.698 | 3.438 |

Table S4. Dipole moment (Debye) values of Rh<sub>n</sub> (n=2-8) clusters evaluated at BLYP/DNP level.

|                 | Neutral | Cationic | Anionic |
|-----------------|---------|----------|---------|
| Rh <sub>2</sub> | 0.0000  | 14.6898  | 5.696   |
| Rh <sub>3</sub> | 0.0000  | 7.1021   | 16.8530 |
| Rh <sub>4</sub> | 0.0030  | 5.8332   | 5.8328  |
| Rh <sub>5</sub> | 0.0765  | 5.6725   | 5.6343  |
| Rh <sub>6</sub> | 0.0030  | 9.5131   | 9.512   |
| Rh <sub>7</sub> | 0.1099  | 6.1883   | 6.4639  |
| Rh <sub>8</sub> | 0.0506  | 6.1127   | 6.086   |

Fig S1. Geometries and point group symmetry of all optimized isomers of Rh<sub>n</sub> (n=2-8) cluster.

| Cluster size      | Point group     | Geometry                                                                            | Cluster size      | Point group     | Geometry                                                                              |
|-------------------|-----------------|-------------------------------------------------------------------------------------|-------------------|-----------------|---------------------------------------------------------------------------------------|
| Rh <sub>3_2</sub> | C <sub>2v</sub> |  | Rh <sub>7_2</sub> | C <sub>3v</sub> |  |
| Rh <sub>4_2</sub> | D <sub>4h</sub> |  | Rh <sub>7_4</sub> | C <sub>s</sub>  |  |
| Rh <sub>5_1</sub> | D <sub>3h</sub> |  | Rh <sub>7_5</sub> | D <sub>5h</sub> |  |
| Rh <sub>5_3</sub> | C <sub>4v</sub> |  | Rh <sub>7_6</sub> | C <sub>3v</sub> |  |
| Rh <sub>5_4</sub> | C <sub>1</sub>  |  | Rh <sub>8_1</sub> | D <sub>2d</sub> |  |

|                    |                 |                                                                                    |                    |                 |                                                                                      |
|--------------------|-----------------|------------------------------------------------------------------------------------|--------------------|-----------------|--------------------------------------------------------------------------------------|
| Rh <sub>6</sub> _1 | C <sub>s</sub>  | 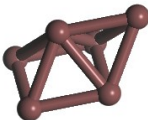  | Rh <sub>8</sub> _2 | D <sub>2h</sub> |   |
| Rh <sub>6</sub> _2 | O <sub>h</sub>  |   | Rh <sub>8</sub> _3 | C <sub>s</sub>  |   |
| Rh <sub>6</sub> _3 | C <sub>1</sub>  |   | Rh <sub>8</sub> _5 | C <sub>2v</sub> |   |
| Rh <sub>6</sub> _4 | C <sub>s</sub>  |   | Rh <sub>8</sub> _6 | C <sub>2v</sub> |   |
| Rh <sub>7</sub> _1 | C <sub>2v</sub> |  | Rh <sub>8</sub> _7 | C <sub>s</sub>  |  |

(Stable isomers are mentioned in original manuscript)
